# Supplementary material for: Microbiological Epidemiology of Invasive Infections Due to Non-Beta-Hemolytic Streptococci, France, 2021
Source: PubMed Central journal article supplement (PMC10269528; doi:10.1128/spectrum.00160-23), 2023-05-18
Supplement: spectrum.00160-23-s0001.pdf [file spectrum.00160-23-s0001.pdf]

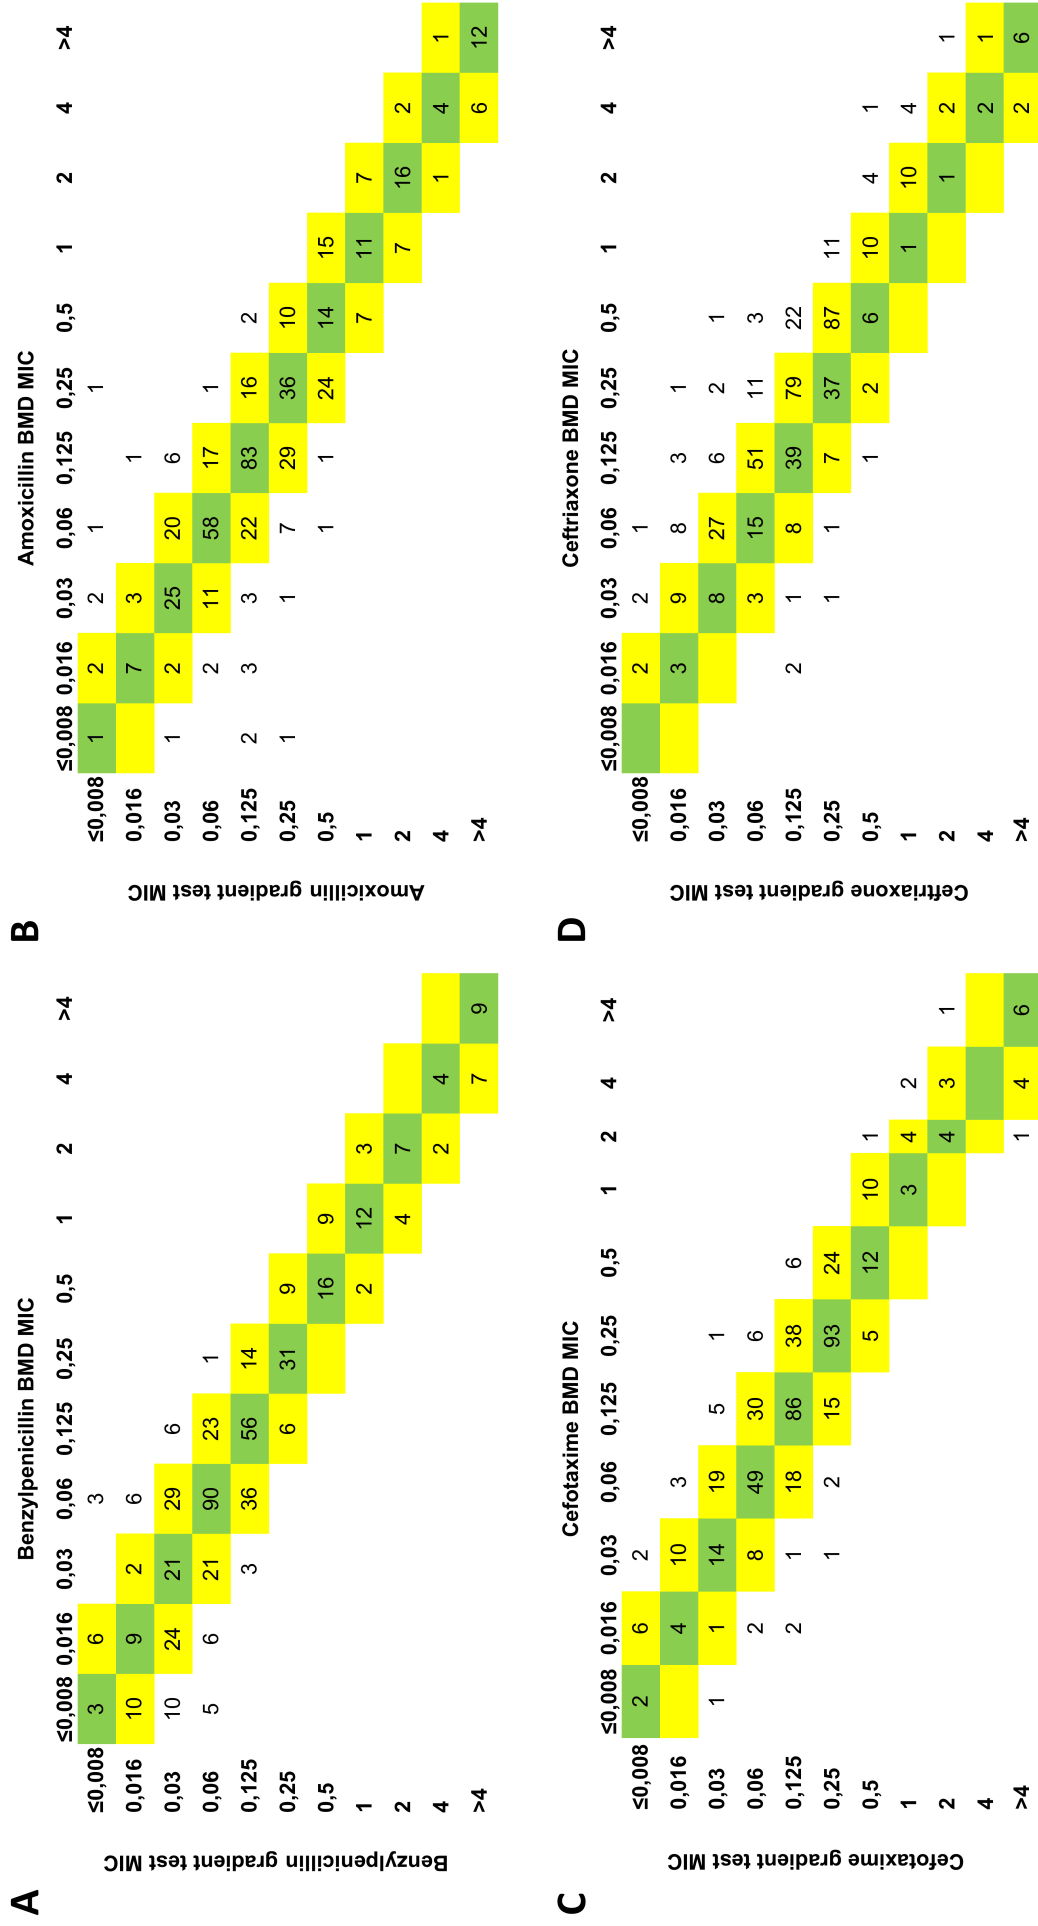

**Figure S1. Correlation between MIC values determined by broth microdilution and gradient Etests for 505 non-beta-haemolytic *Streptococcus* invasive strains.** MIC values of benzylpenicillin (A), amoxicillin (B), cefotaxime (C) and ceftriaxone (D) were determined for all the isolates by broth microdilution (BMD) using a custom microtiter plate (SWE1SPEC, ThermoFisher) and by gradient Etest and interpreted according to EUCAST recommendations (v 13.0).
