# Supplementary material for: Microbiological Epidemiology of Invasive Infections Due to Non-Beta-Hemolytic Streptococci, France, 2021
Source: PubMed Central journal article supplement (PMC10269528; doi:10.1128/spectrum.00160-23), 2023-05-18
Supplement: spectrum.00160-23-s0002.pdf [file spectrum.00160-23-s0002.pdf]

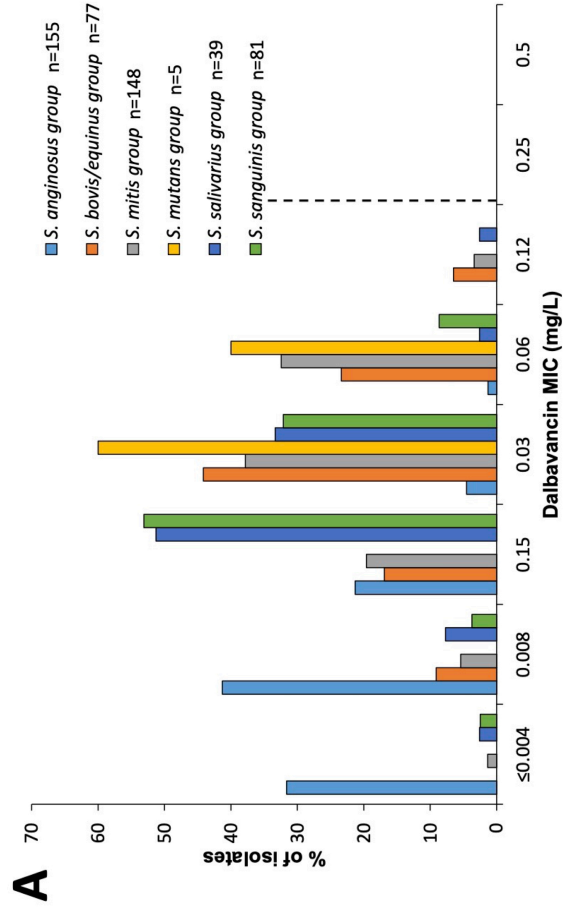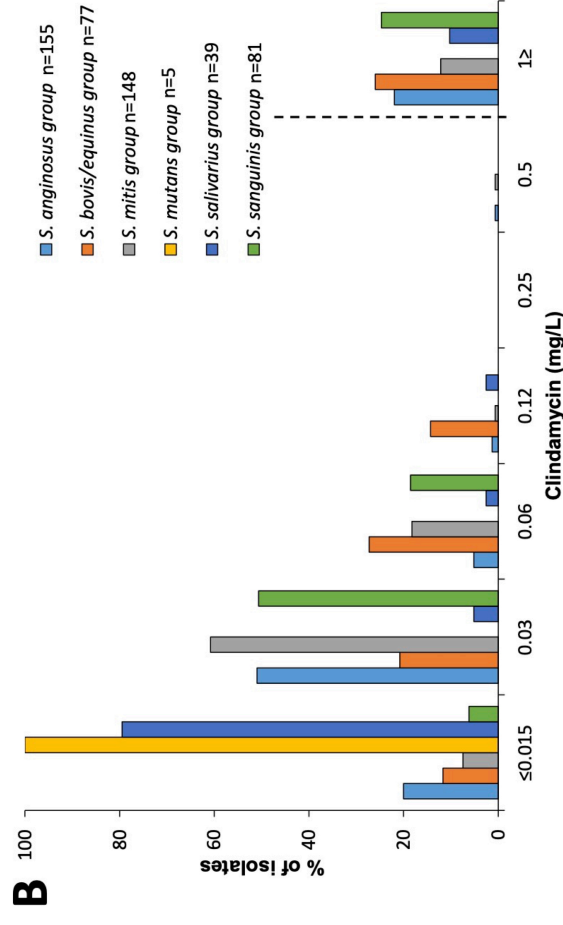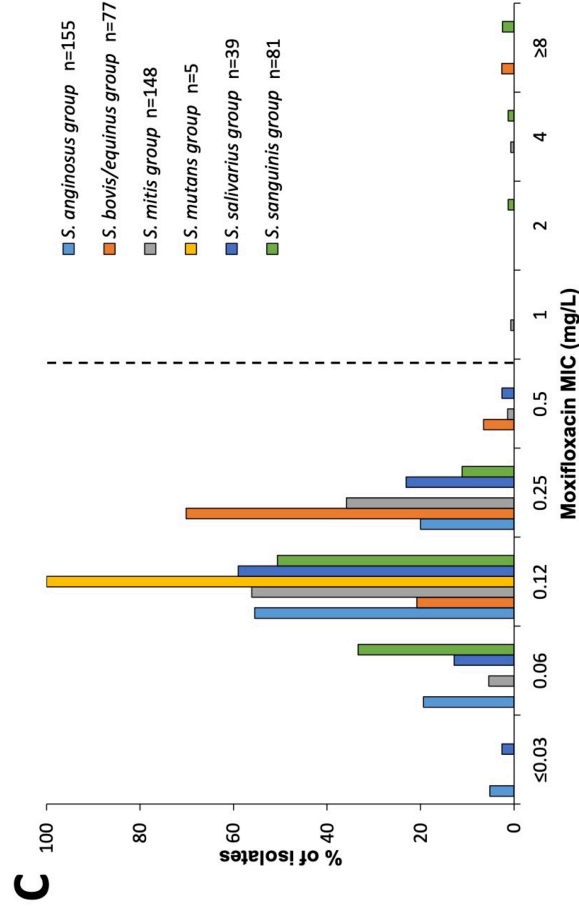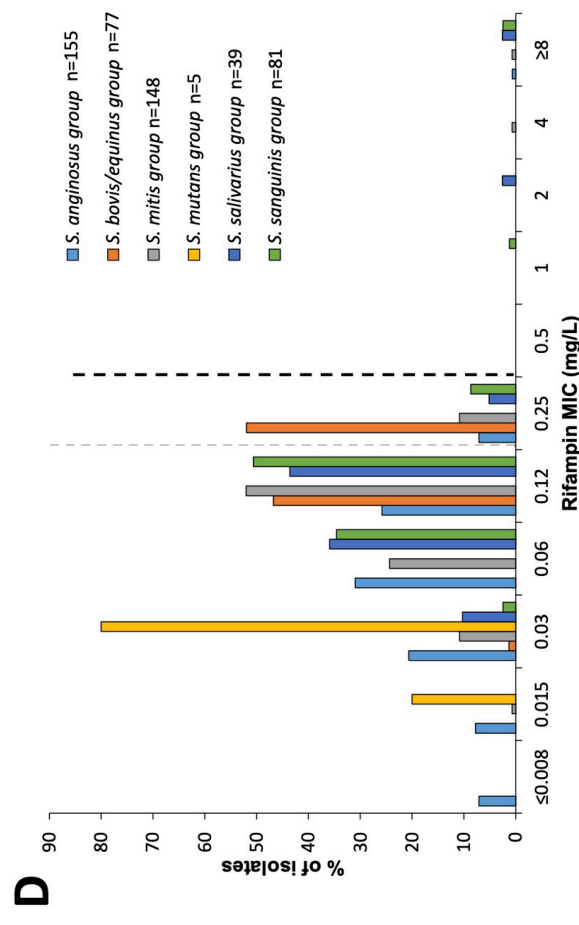

**Figure S2. Distribution of dalbavancin (A), clindamycin (B), moxifloxacin (C) and rifampin (D) MIC values within each non-beta-haemolytic streptococcal group (n=505).**

MIC values were determined by broth microdilution. The dotted lines indicate the EUCAST v 13.0 clinical breakpoints (A, B), and the ECOFFs (C, D), dalbavancin clinical breakpoint being only applicable to isolates of the *anginosus* group.
