# Supplementary material for: Microbiological Epidemiology of Invasive Infections Due to Non-Beta-Hemolytic Streptococci, France, 2021
Source: PubMed Central journal article supplement (PMC10269528; doi:10.1128/spectrum.00160-23), 2023-05-18
Supplement: spectrum.00160-23-s0003.pdf [file spectrum.00160-23-s0003.pdf]

1 Table S1. Clinical manifestations of the 522 NHBS invasive infections.

| <i>Streptococcus</i> group  | Bacteraemia without focus    | Intra-abdominal infections  | Endocarditis                | Pulmonary infections       | Bone and joint infections  | Skin and soft tissue infections | Urinary tract infections   | Upper respiratory tract infections | Central nervous system infections | Others <sup>a</sup>       | Total, n (%)                |
|-----------------------------|------------------------------|-----------------------------|-----------------------------|----------------------------|----------------------------|---------------------------------|----------------------------|------------------------------------|-----------------------------------|---------------------------|-----------------------------|
| <b><i>anginosus</i></b>     | <b>58</b>                    | <b>43</b>                   | <b>3</b>                    | <b>26</b>                  | <b>13</b>                  | <b>14</b>                       | <b>5</b>                   | <b>6</b>                           | <b>2</b>                          | <b>2</b>                  | <b>172 (33.0%)</b>          |
| <i>S. anginosus</i>         | 33                           | 30                          | 3                           | 10                         | 6                          | 8                               | 4                          | 1                                  | 0                                 | 2                         | 97 (18.6%)                  |
| <i>S. constellatus</i>      | 22                           | 12                          | 0                           | 7                          | 5                          | 3                               | 1                          | 2                                  | 1                                 | 0                         | 53 (10.2%)                  |
| <i>S. intermedius</i>       | 3                            | 1                           | 0                           | 9                          | 2                          | 3                               |                            | 3                                  | 1                                 | 0                         | 22 (4.2%)                   |
| <b><i>bovis/equinus</i></b> | <b>43</b>                    | <b>11</b>                   | <b>12</b>                   | <b>1</b>                   | <b>3</b>                   | <b>2</b>                        | <b>2</b>                   | <b>0</b>                           | <b>2</b>                          | <b>1</b>                  | <b>77 (14.8%)</b>           |
| <i>S. gallolyticus</i>      | 16                           | 3                           | 8                           | 0                          | 1                          | 0                               | 1                          | 0                                  | 1                                 | 0                         | 30 (5.7%)                   |
| <i>S. infantarius</i>       | 7                            | 1                           | 1                           | 0                          | 0                          | 1                               | 0                          | 0                                  | 0                                 | 0                         | 10 (1.9%)                   |
| <i>S. lutetiensis</i>       | 7                            | 4                           | 1                           | 0                          | 1                          | 0                               | 0                          | 0                                  | 0                                 | 0                         | 13 (2.5%)                   |
| <i>S. pasteurianus</i>      | 13                           | 3                           | 2                           | 1                          | 1                          | 1                               | 1                          | 0                                  | 1                                 | 1                         | 24 (4.6%)                   |
| <b><i>mitis</i></b>         | <b>78</b>                    | <b>16</b>                   | <b>20</b>                   | <b>15</b>                  | <b>7</b>                   | <b>3</b>                        | <b>3</b>                   | <b>4</b>                           | <b>0</b>                          | <b>2</b>                  | <b>148 (28.4%)</b>          |
| <i>S. australis</i>         | 2                            | 2                           | 0                           | 0                          | 0                          | 0                               | 0                          | 0                                  | 0                                 | 0                         | 4 (0.8%)                    |
| <i>S. cristatus</i>         | 2                            | 3                           | 1                           | 0                          | 1                          | 0                               | 0                          | 0                                  | 0                                 | 0                         | 7 (1.3%)                    |
| <i>S. infantis</i>          | 1                            | 1                           | 0                           | 0                          | 0                          | 0                               | 0                          | 1                                  | 0                                 | 0                         | 3 (0.6%)                    |
| <i>S. massiliensis</i>      | 1                            | 0                           | 0                           | 1                          | 0                          | 0                               | 0                          | 0                                  | 0                                 | 1                         | 3 (0.6%)                    |
| <i>S. mitis</i>             | 26                           | 2                           | 4                           | 3                          | 0                          | 1                               | 1                          | 1                                  | 0                                 | 0                         | 38 (7.3%)                   |
| <i>S. oralis</i>            | 45                           | 6                           | 14                          | 6                          | 6                          | 1                               | 2                          | 2                                  | 0                                 | 1                         | 83 (15.9%)                  |
| <i>S. peroris</i>           | 1                            | 1                           | 0                           | 2                          | 0                          | 0                               | 0                          | 0                                  | 0                                 | 0                         | 4 (0.8%)                    |
| <i>S. pseudopneumoniae</i>  | 0                            | 0                           | 1                           | 3                          | 0                          | 1                               | 0                          | 0                                  | 0                                 | 0                         | 5 (1.0%)                    |
| <i>S. sinensis</i>          | 0                            | 1                           | 0                           | 0                          | 0                          | 0                               | 0                          | 0                                  | 0                                 | 0                         | 1 (0.2%)                    |
| <b><i>mutans</i></b>        | <b>3</b>                     | <b>0</b>                    | <b>2</b>                    | <b>0</b>                   | <b>0</b>                   | <b>0</b>                        | <b>0</b>                   | <b>0</b>                           | <b>0</b>                          | <b>0</b>                  | <b>5 (1.0%)</b>             |
| <i>S. mutans</i>            | 3                            | 0                           | 2                           | 0                          | 0                          | 0                               | 0                          | 0                                  | 0                                 | 0                         | 5 (1.0%)                    |
| <b><i>salivarius</i></b>    | <b>21</b>                    | <b>10</b>                   | <b>2</b>                    | <b>3</b>                   | <b>0</b>                   | <b>1</b>                        | <b>0</b>                   | <b>0</b>                           | <b>2</b>                          | <b>0</b>                  | <b>39 (7.5%)</b>            |
| <i>S. salivarius</i>        | 16                           | 7                           | 2                           | 2                          | 0                          | 1                               | 0                          | 0                                  | 2                                 | 0                         | 30 (5.7%)                   |
| <i>S. thermophilus</i>      | 1                            | 0                           | 0                           | 0                          | 0                          | 0                               | 0                          | 0                                  | 0                                 | 0                         | 1 (0.2%)                    |
| <i>S. vestibularis</i>      | 4                            | 3                           | 0                           | 1                          | 0                          | 0                               | 0                          | 0                                  | 0                                 | 0                         | 8 (1.5%)                    |
| <b><i>sanguinis</i></b>     | <b>38</b>                    | <b>15</b>                   | <b>19</b>                   | <b>6</b>                   | <b>3</b>                   | <b>0</b>                        | <b>0</b>                   | <b>0</b>                           | <b>0</b>                          | <b>0</b>                  | <b>81 (15.5%)</b>           |
| <i>S. gordonii</i>          | 10                           | 1                           | 3                           | 0                          | 2                          | 0                               | 0                          | 0                                  | 0                                 | 0                         | 16 (3.1%)                   |
| <i>S. parasanguinis</i>     | 11                           | 12                          | 2                           | 4                          | 0                          | 0                               | 0                          | 0                                  | 0                                 | 0                         | 29 (5.6%)                   |
| <i>S. sanguinis</i>         | 17                           | 2                           | 14                          | 2                          | 1                          | 0                               | 0                          | 0                                  | 0                                 | 0                         | 36 (6.9%)                   |
| <b>Total, n (%)</b>         | <b>241</b><br><b>(46.2%)</b> | <b>95</b><br><b>(18.2%)</b> | <b>58</b><br><b>(11.1%)</b> | <b>51</b><br><b>(9.8%)</b> | <b>26</b><br><b>(5.0%)</b> | <b>20</b><br><b>(3.8%)</b>      | <b>10</b><br><b>(1.9%)</b> | <b>10</b><br><b>(1.9%)</b>         | <b>6</b><br><b>(1.1%)</b>         | <b>5</b><br><b>(1.0%)</b> | <b>522</b><br><b>(100%)</b> |

2 <sup>a</sup> including vascular and catheter-related bloodstream infections (n = 3), endophthalmitis (n = 1) and upper genital infection (n = 1).

3 **Table S2. Comparison of MIC values obtained by BMD and gradient Etest on 505 NBHS.**

| <b>Agreement</b>             | <b>Benzylpenicillin</b> | <b>Amoxicillin</b> | <b>Cefotaxime</b> | <b>Ceftriaxone</b> |
|------------------------------|-------------------------|--------------------|-------------------|--------------------|
| <b>Categorical agreement</b> | 97.8%                   | 95.0%              | 97.8%             | 94.9%              |
| Minor errors                 | 2.2%                    | 5.0%               | NA                | NA                 |
| Major errors                 | 0%                      | 0%                 | NA                | NA                 |
| Very major errors            | 0%                      | 0%                 | 2.2%              | 5.1%               |
| <b>Essential agreement</b>   | 95.1%                   | 94.1%              | 92.9%             | 82.9%              |
| <b>Absolute agreement</b>    | 54.4%                   | 53.5%              | 55.0%             | 22.9%              |
| <b>Bias</b>                  | 1.1%                    | 2.9%               | 24.3%             | 68.6%              |

4 NA: not applicable.

5 Interpretation according to EUCAST guidelines v 13.0.

6

7 **Table S3. Beta-lactam resistance phenotypes of the 522 NBHS.**

| Beta-lactam resistance phenotype, n (%)                                         | <i>Streptococcus</i> group |                              |                       |                      |                           |                          |
|---------------------------------------------------------------------------------|----------------------------|------------------------------|-----------------------|----------------------|---------------------------|--------------------------|
|                                                                                 | <i>anginosus</i><br>n=172  | <i>bovis/equinus</i><br>n=77 | <i>mitis</i><br>n=148 | <i>mutans</i><br>n=5 | <i>salivarius</i><br>n=39 | <i>sanguinis</i><br>n=81 |
| Susceptible                                                                     | 172<br>(100%)              | 77<br>(100%)                 | 102<br>(68.9%)        | 5<br>(100%)          | 28<br>(71.8%)             | 39<br>(48.1%)            |
| Benzylpenicillin                                                                | 0                          | 0                            | 1<br>(0.7)            | 0                    | 2<br>(5.1%)               | 0                        |
| Benzylpenicillin + aminopenicillins                                             | 0                          | 0                            | 8<br>(5.4%)           | 0                    | 4<br>(10.3%)              | 17<br>(43.6%)            |
| Benzylpenicillin + aminopenicillins + 3 <sup>rd</sup> generation cephalosporins | 0                          | 0                            | 32<br>(21.6%)         | 0                    | 4<br>(10.3%)              | 15<br>(18.5%)            |
| Benzylpenicillin + 3 <sup>rd</sup> generation cephalosporins                    | 0                          | 0                            | 1<br>(0.7%)           | 0                    | 0                         | 0                        |
| Aminopenicillins                                                                | 0                          | 0                            | 0                     | 0                    | 0                         | 9<br>(11.1%)             |
| 3 <sup>rd</sup> generation cephalosporin                                        | 0                          | 0                            | 4<br>(2.7%)           | 0                    | 1<br>(2.6%)               | 1<br>(1.2%)              |

8 Values indicated the number (%) of isolates displaying intermediate susceptibility or resistance to benzylpenicillin and aminopenicillins  
9 (amoxicillin or ampicillin), and resistance to 3<sup>rd</sup> generation cephalosporins (cefotaxime or ceftriaxone) according to EUCAST v 13.0 breakpoints.

10

11

12

13

14 **Table S4. Performances of the 1-unit PEN-disk screening for the detection of decreased-susceptibility to beta-lactams.**

| <i>Streptococcus</i> group (n) | Sensitivity   |               | Specificity  |               | Positive predictive value |               | Negative predictive value |               |
|--------------------------------|---------------|---------------|--------------|---------------|---------------------------|---------------|---------------------------|---------------|
|                                | 18 mm         | 21 mm         | 18 mm        | 21 mm         | 18 mm                     | 21 mm         | 18 mm                     | 21 mm         |
| <i>mitis</i> (148)             | 69.6 %        | 87.0 %        | 100 %        | 92.2 %        | 100 %                     | 83.3 %        | 87.9 %                    | 94.0 %        |
| <i>salivarius</i> (39)         | 72.7 %        | 81.8 %        | 100 %        | 75.0 %        | 100 %                     | 56.3 %        | 90.3 %                    | 91.3 %        |
| <i>sanguinis</i> (81)          | 45.2 %        | 69.0 %        | 100 %        | 97.4 %        | 100 %                     | 96.7 %        | 62.9 %                    | 74.5 %        |
| <b>Total isolates (n=522)</b>  | <b>59.6 %</b> | <b>78.8 %</b> | <b>100 %</b> | <b>95.0 %</b> | <b>100 %</b>              | <b>78.8 %</b> | <b>91.0 %</b>             | <b>95.0 %</b> |

15 <sup>a</sup> Susceptible breakpoints from EUCAST v 12.0 (18 mm) and EUCAST v 13.0 (21 mm).

16 PEN, benzylpenicillin.

17

18

19 **Table S5. Beta-lactam resistance phenotypes of the 40 NBHS isolates falsely categorised as susceptible by the 1-unit PEN disk screening**  
 20 **(susceptible breakpoint 18 mm, EUCAST v12.0).**

| Phenotype <sup>a</sup> |                                                 |                                                                   |                          | Isolates<br>n (%) | <i>Streptococcus</i> group  |                              |  |
|------------------------|-------------------------------------------------|-------------------------------------------------------------------|--------------------------|-------------------|-----------------------------|------------------------------|--|
| Benzympenicillin       | Aminopenicillins<br>(ampicillin or amoxicillin) | Third-generation<br>cephalosporins<br>(cefotaxime or ceftriaxone) | <i>mitis</i><br>14 (35%) |                   | <i>salivarius</i><br>3 (7%) | <i>sanguinis</i><br>23 (58%) |  |
| I                      | S                                               | S                                                                 | 2 (5 %)                  | 0                 | 2                           | 0                            |  |
| I                      | I                                               | S                                                                 | 14 (35 %)                | 3                 | 0                           | 11                           |  |
| I                      | I                                               | R                                                                 | 8 (20 %)                 | 6                 | 0                           | 2                            |  |
| I                      | S                                               | R                                                                 | 1 (2 %)                  | 1                 | 0                           | 0                            |  |
| S                      | S                                               | R                                                                 | 6 (15 %)                 | 4                 | 1                           | 1                            |  |
| S                      | I                                               | S                                                                 | 9 (23 %)                 | 0                 | 0                           | 9                            |  |

21 <sup>a</sup> MIC values determined by broth microdilution.

22 NBHS, non-beta-haemolytic streptococci; S, susceptible; I, susceptible increased exposure; R, resistant.

23

24 **Table S6. Beta-lactam resistance phenotypes of the 21 NBHS isolates falsely categorised as susceptible by the 1-unit PEN disk screening**  
 25 **(susceptible breakpoint 21 mm, EUCAST v13.0).**

| Phenotype <sup>a</sup> |                                                 |                                                                   |           | Isolates<br>n (%) | <i>Streptococcus</i> group |                               |                                |
|------------------------|-------------------------------------------------|-------------------------------------------------------------------|-----------|-------------------|----------------------------|-------------------------------|--------------------------------|
| Benzympenicillin       | Aminopenicillins<br>(ampicillin or amoxicillin) | Third-generation<br>cephalosporins<br>(cefotaxime or ceftriaxone) |           |                   | <i>mitis</i><br>6 (28.6%)  | <i>salivarius</i><br>2 (9.5%) | <i>sanguinis</i><br>13 (61.9%) |
| I                      | S                                               | S                                                                 | 2 (9.5%)  | 0                 | 2                          | 0                             |                                |
| I                      | I                                               | S                                                                 | 4 (19.0%) | 1                 | 0                          | 3                             |                                |
| I                      | I                                               | R                                                                 | 2 (9.5%)  | 1                 | 0                          | 1                             |                                |
| I                      | S                                               | R                                                                 | 1 (4.8%)  | 1                 | 0                          | 0                             |                                |
| S                      | S                                               | R                                                                 | 4 (19.0%) | 3                 | 0                          | 1                             |                                |
| S                      | I                                               | S                                                                 | 8 (38.1%) | 0                 | 0                          | 8                             |                                |

26 <sup>a</sup> MIC values determined by broth microdilution.

27 NBHS, non-beta-haemolytic streptococci; S, susceptible; I, susceptible increased exposure; R, resistant.

28

29

30 **Table S7. Clinical characteristics of the 79 NBHS invasive infections in 2022.**

| <i>Streptococcus</i> group                                     | <i>anginosus</i>     | <i>bovis/equinus</i>  | <i>mitis</i>        | <i>salivarius</i>   | <i>sanguinis</i>    | Total                 |
|----------------------------------------------------------------|----------------------|-----------------------|---------------------|---------------------|---------------------|-----------------------|
| Sex ratio M/F                                                  | 1.6                  | 0.9                   | 1.6                 | (4 males)           | 2.5                 | 1.5                   |
| Age, median<br>(min – max)                                     | 50 y<br>(0 d - 97 y) | 77 y<br>(0 d - 100 y) | 57 y<br>(11 - 95 y) | 69 y<br>(65 - 87 y) | 85 y<br>(11 - 98 y) | 65 y<br>(0 d - 100 y) |
| Age, interquartile range, in years                             | 31 - 69              | 62 - 86               | 40 - 70             | ND                  | 49 - 93             | 43 - 81               |
| <b>Total, n (%)</b>                                            | <b>26 (33%)</b>      | <b>21 (27%)</b>       | <b>21 (27%)</b>     | <b>4 (5%)</b>       | <b>7 (8%)</b>       | <b>79 (100%)</b>      |
| <b>Adult cases (≥ 18 y), n (%)<sup>a</sup></b>                 | <b>24 (92%)</b>      | <b>19 (90%)</b>       | <b>20 (95%)</b>     | <b>4</b>            | <b>6</b>            | <b>73 (92%)</b>       |
| Bacteremia without focus                                       | 2 (8%)               | 12 (57%)              | 5 (24%)             | 3                   | 1                   | 23 (29%)              |
| Intra-abdominal infections                                     | 5 (19%)              | 0                     | 5 (24%)             | 0                   | 0                   | 10 (13%)              |
| Endocarditis                                                   | 1 (4%)               | 4 (19%)               | 2 (10%)             | 0                   | 1                   | 8 (10%)               |
| Pulmonary infections                                           | 4 (15%)              | 0                     | 2 (10%)             | 0                   | 2                   | 8 (10% <sup>o</sup> ) |
| Bone and joint infections                                      | 2 (8%)               | 3 (14%)               | 2 (10%)             | 1                   | 1                   | 9 (11%)               |
| Skin and soft tissue infections                                | 1 (4%)               | 0                     | 2 (10%)             | 0                   | 0                   | 3 (4%)                |
| Upper respiratory tract infections                             | 4 (15%)              | 0                     | 2 (10%)             | 0                   | 0                   | 6 (8%)                |
| Central nervous system infections                              | 1 (4%)               | 0                     | 0                   | 0                   | 0                   | 1 (1%)                |
| Others <sup>b</sup>                                            | 4 (15%)              | 0                     | 0                   | 0                   | 1                   | 5 (6%)                |
| <b>Neonates and infants (birth - ≤ 1 y), n (%)<sup>a</sup></b> | <b>1 (4%)</b>        | <b>2 (10%)</b>        | <b>0</b>            | <b>0</b>            | <b>0</b>            | <b>3 (4%)</b>         |
| Early Onset Sepsis (0-3 d)                                     | 1 (4%)               | 2 (10%)               | 0                   | 0                   | 0                   | 3 (4%)                |
| <b>Pediatric cases (1 - 18 y), n (%)<sup>a</sup></b>           | <b>1 (4%)</b>        | <b>0</b>              | <b>1 (5%)</b>       | <b>0</b>            | <b>1</b>            | <b>3 (4%)</b>         |
| Bacteremia without focus                                       | 0                    | 0                     | 1 (5%)              | 0                   | 0                   | 1 (1%)                |
| Others <sup>c</sup>                                            | 1 (4%)               | 0                     | 0                   | 0                   | 1                   | 2 (3%)                |

31 <sup>a</sup> Percentages are relative to the total isolates within each *Streptococcus* group and were not calculated for the *S. salivarius* and *S. sanguinis*  
32 groups because of the small number of cases.

33 <sup>b</sup> Including upper -genital infections (n = 4) and urinary tract infections (n = 1).

34 <sup>c</sup> Including skin and soft tissue infection (n = 1), upper respiratory tract infections (n = 1).

35 d, days; m, months; y, years; ND, not determined.

36 **Table S8. Beta-lactam agents - Susceptibility and MIC distributions of 79 invasive NBHS isolates in 2022.**

| <i>Streptococcus</i><br>group (n; %) | Antimicrobial<br>agent | MIC <sup>a</sup> |       |       |       |      |     |          |          |           | MIC interpretation <sup>b</sup> , n (%) |           |           |
|--------------------------------------|------------------------|------------------|-------|-------|-------|------|-----|----------|----------|-----------|-----------------------------------------|-----------|-----------|
|                                      |                        | ≤0.016           | 0.032 | 0.064 | 0.125 | 0.25 | 0.5 | 1        | 2        | ≥4        | S                                       | I         | R         |
| <i>anginosus</i><br>(26; 33%)        | Benzylpenicillin       | 0                | 7     | 10    | 7     | 2    | 0   | 0        | 0        | 0         | 26 (100%)                               | 0         | 0         |
|                                      | Amoxicillin            | 2                | 2     | 3     | 7     | 10   | 2   | 0        | 0        | 0         | 26 (100%)                               | 0         | 0         |
|                                      | Cefotaxime             | 1                | 0     | 4     | 4     | 16   | 1   | 0        | 0        | 0         | 26 (100%)                               | NA        | 0         |
|                                      | Ceftriaxone            | 0                | 0     | 3     | 8     | 14   | 1   | 0        | 0        | 0         | 26 (100%)                               | NA        | 0         |
| <i>bovis/equinus</i><br>(21; 27%)    | Benzylpenicillin       | 0                | 0     | 8     | 9     | 4    | 0   | 0        | 0        | 0         | 21 (100%)                               | 0         | 0         |
|                                      | Amoxicillin            | 0                | 1     | 2     | 11    | 7    | 0   | 0        | 0        | 0         | 21 (100%)                               | 0         | 0         |
|                                      | Cefotaxime             | 0                | 0     | 3     | 8     | 10   | 0   | 0        | 0        | 0         | 21 (100%)                               | NA        | 0         |
|                                      | Ceftriaxone            | 1                | 2     | 0     | 15    | 3    | 0   | 0        | 0        | 0         | 21 (100%)                               | NA        | 0         |
| <i>mitis</i><br>(21; 27%)            | Benzylpenicillin       | 0                | 1     | 1     | 3     | 2    | 0   | 4        | 0        | <u>10</u> | 7 (33%)                                 | 4 (19%)   | 10 (48%)  |
|                                      | Amoxicillin            | 0                | 1     | 1     | 2     | 1    | 3   | 2        | 1        | <u>10</u> | 8 (38%)                                 | 3 (14%)   | 10 (48%)  |
|                                      | Cefotaxime             | 0                | 0     | 1     | 2     | 3    | 2   | <u>1</u> | <u>1</u> | <u>11</u> | 8 (38%)                                 | NA        | 13 (62%)  |
|                                      | Ceftriaxone            | 0                | 1     | 1     | 2     | 3    | 2   | 0        | <u>3</u> | <u>9</u>  | 9 (43%)                                 | NA        | 12 (57%)  |
| <i>salivarius</i><br>(4; 5%)         | Benzylpenicillin       | 0                | 0     | 1     | 1     | 1    | 1   | 0        | 0        | 0         | 3 (75%)                                 | 1 (25%)   | 0         |
|                                      | Amoxicillin            | 0                | 0     | 1     | 1     | 0    | 0   | 2        | 0        | 0         | 2 (50%)                                 | 2 (50%)   | 0         |
|                                      | Cefotaxime             | 1                | 0     | 1     | 0     | 1    | 0   | <u>1</u> | 0        | 0         | 3 (75%)                                 | NA        | 1 (25%)   |
|                                      | Ceftriaxone            | 0                | 1     | 1     | 0     | 1    | 1   | 0        | 0        | 0         | 4 (100%)                                | NA        | 0         |
| <i>sanguinis</i><br>(7; 8%)          | Benzylpenicillin       | 2                | 0     | 2     | 1     | 0    | 0   | 1        | 0        | <u>1</u>  | 5 (71%)                                 | 1 (14.5%) | 1 (14.5%) |
|                                      | Amoxicillin            | 0                | 1     | 0     | 2     | 2    | 0   | 0        | 1        | <u>1</u>  | 5 (71%)                                 | 1 (14.5%) | 1 (14.5%) |
|                                      | Cefotaxime             | 1                | 1     | 3     | 0     | 0    | 1   | 0        | 0        | <u>1</u>  | 6 (86%)                                 | NA        | 1 (14%)   |
|                                      | Ceftriaxone            | 0                | 2     | 3     | 0     | 1    | 0   | 0        | 0        | <u>1</u>  | 6 (86%)                                 | NA        | 1 (14%)   |

37 <sup>a</sup> MICs determined by gradient Etest.

38 <sup>b</sup> MICs interpretation according to EUCAST v 13.0. Susceptible isolates in shaded area, resistant isolates underlined.

39 NA, not applicable; S, susceptible; I, susceptible increased exposure; R, resistant.

40

41



42 **Table S9. Macrolides, lincosamides and streptogramins (MLS) – Susceptibility, resistance phenotypes and genotypes of the 79 invasive**  
 43 **NBHS isolates in 2022.**

| <i>Streptococcus</i><br>group  | Resistant<br>isolates,<br>n (%) | Disk diffusion phenotype <sup>a,b</sup> , n (%) |             |                   |                   | Resistance determinants, n (%) <sup>b</sup> |                |                |                |                |                |
|--------------------------------|---------------------------------|-------------------------------------------------|-------------|-------------------|-------------------|---------------------------------------------|----------------|----------------|----------------|----------------|----------------|
|                                |                                 | L/LS <sub>A</sub>                               | M           | iMLS <sub>B</sub> | cMLS <sub>B</sub> | <i>mef</i>                                  | <i>erm</i> (A) | <i>erm</i> (B) | <i>erm</i> (T) | <i>lsa</i> (A) | <i>lsa</i> (B) |
| <i>anginosus</i><br>(n=26)     | 12<br>(46%)                     | 2<br>(17%)                                      | 0<br>(0%)   | 2<br>(17%)        | 8<br>(67%)        | 0<br>(0%)                                   | 4<br>(33%)     | 5<br>(42%)     | 1<br>(8%)      | 3<br>(25%)     | 2<br>(17%)     |
| <i>bovis/equinus</i><br>(n=21) | 13<br>(62%)                     | 3<br>(23%)                                      | 0<br>(0%)   | 0<br>(0%)         | 10<br>(77%)       | 0<br>(0%)                                   | 2<br>(15%)     | 7<br>(54%)     | 1<br>(8%)      | 0<br>(0%)      | 1<br>(8%)      |
| <i>mitis</i><br>(n=21)         | 13<br>(62%)                     | 0<br>(0%)                                       | 10<br>(77%) | 0<br>(0%)         | 3<br>(23%)        | 12<br>(92%)                                 | 1<br>(8%)      | 2<br>(15%)     | 0<br>(0%)      | 0<br>(0%)      | 0<br>(0%)      |
| <i>salivarius</i><br>(n=4)     | 2<br>(50%)                      | 0<br>(0%)                                       | 1<br>(50%)  | 0<br>(0%)         | 1<br>(50%)        | 1<br>(50%)                                  | 1<br>(50%)     | 0<br>(0%)      | 0<br>(0%)      | 0<br>(0%)      | 0<br>(0%)      |
| <i>sanguinis</i><br>(n=7)      | 5<br>(71%)                      | 1<br>(20%)                                      | 3<br>(60%)  | 0<br>(0%)         | 1<br>(20%)        | 3<br>(60%)                                  | 1<br>(20%)     | 0<br>(0%)      | 0<br>(0%)      | 1<br>(20%)     | 1<br>(20%)     |
| Total<br>(n=79)                | 45<br>(57%)                     | 6<br>(13%)                                      | 14<br>(31%) | 2<br>(4%)         | 23<br>(51%)       | 16<br>(36%)                                 | 9<br>(20%)     | 14<br>(31%)    | 2<br>(4%)      | 4<br>(9%)      | 4<br>(9%)      |

44 <sup>a</sup> DD phenotypes were interpreted according to the guidelines on Antibiotic Susceptibility Testing of the French Society for Microbiology (CA-  
 45 SFM).

46 <sup>b</sup> Percentages are relative to total resistant isolates within each group.

47 L, resistance to lincosamides; LS<sub>A</sub>, resistance to lincosamides and streptogramin A; M, efflux-mediated resistance to C14 and C15 macrolides;  
 48 iMLS<sub>B</sub>, inducible resistance to macrolides, lincosamides and streptogramin B; cMLS<sub>B</sub>, constitutive resistance to macrolides, lincosamides and  
 49 streptogramin B; NA: not applicable.

50

51

52  
53

**Table S10. Tetracyclines - Susceptibility and resistance determinants of the 79 invasive NBHS isolates in 2022<sup>a</sup>.**

| <i>Streptococcus</i> group  | Resistant isolates, n (%) | Resistance determinant, n (%) <sup>b</sup> |                |                |
|-----------------------------|---------------------------|--------------------------------------------|----------------|----------------|
|                             |                           | <i>tet</i> (M)                             | <i>tet</i> (L) | <i>tet</i> (O) |
| <i>anginosus</i> , n=26     | 10 (38%)                  | 7 (70%)                                    | 1 (10%)        | 4 (40%)        |
| <i>bovis/equinus</i> , n=21 | 17 (81%)                  | 13 (76%)                                   | 8 (47%)        | 4 (24%)        |
| <i>mitis</i> , n=21         | 5 (24%)                   | 5 (100%)                                   | 0 (0%)         | 0 (0%)         |
| <i>salivarius</i> , n=4     | 0 (0%)                    | -                                          | -              | -              |
| <i>sanguinis</i> , n=7      | 0 (0%)                    | -                                          | -              | -              |
| Total, n=79                 | 32 (41%)                  | 25 (78%)                                   | 9 (28%)        | 8 (25%)        |

54 <sup>a</sup> Interpreted according to the guidelines on Antibiotic Susceptibility Testing of the French Society for Microbiology.

55 <sup>b</sup> Percentages are relative to total resistant isolates within each group.

56

57
